# Supplementary material for: Graphitic carbon nitride nanosheet@metal–organic framework core–shell nanoparticles for photo-chemo combination therapy
Source: Royal Society of Chemistry journal article supplement (doi:10.1039/c5nr04436g), 2015-01-01
Supplement: c5nr04436g1.pdf [file c5nr04436g1.pdf]

## Supporting Information

Graphitic Carbon Nitride Nanosheet @ Metal-Organic Framework Core-shell Nanoparticles for Photo-chemo Combination Therapy

Rui Chen, Jinfeng Zhang, Yu Wang, Xianfeng Chen\*, J. Antonio Zapien and Chun-Sing Lee\*

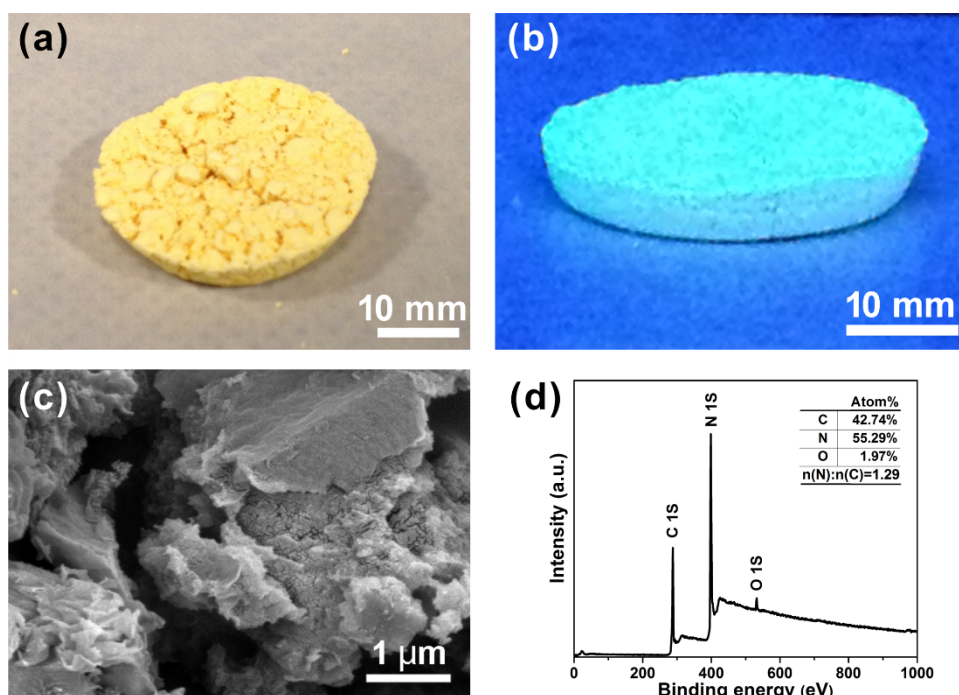

**Fig. S1.** Bulk g-C<sub>3</sub>N<sub>4</sub> under (a) visible light and (b) UV light; (c) an SEM image (d) an XPS elemental analysis of bulk g-C<sub>3</sub>N<sub>4</sub>.

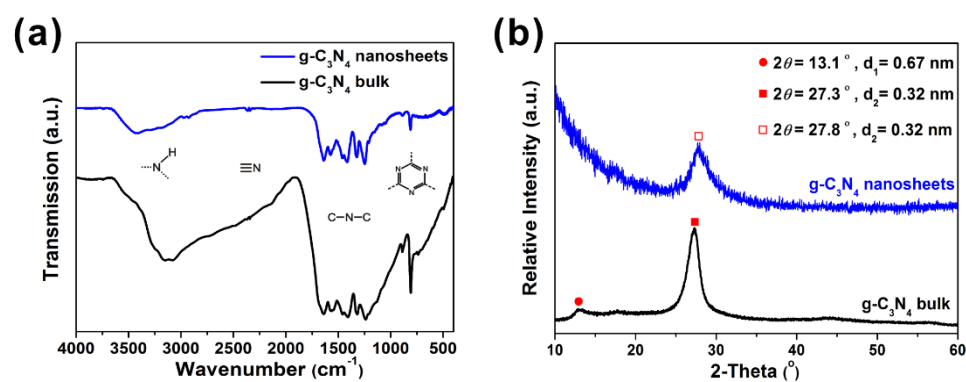

**Fig. S2.** (a) FTIR spectra (b) XRD diffraction patterns of g-C<sub>3</sub>N<sub>4</sub> bulk (black) and g-C<sub>3</sub>N<sub>4</sub> nanosheets (blue).

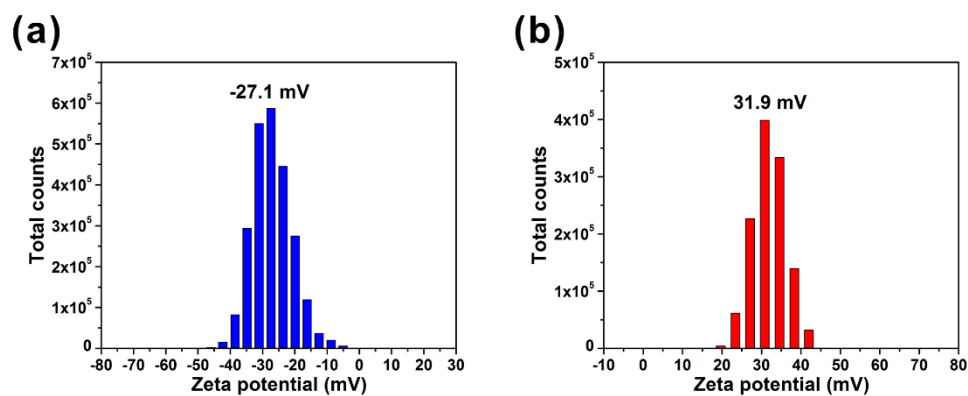

**Fig. S3.** Zeta potentials of (a) g-C<sub>3</sub>N<sub>4</sub> nanosheets, (b) g-C<sub>3</sub>N<sub>4</sub>@ZIF-8 nanoparticles.

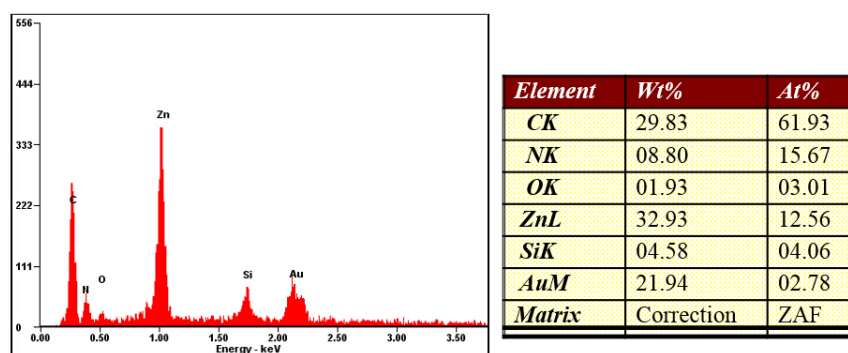

**Fig. S4.** EDX analysis of DOX-loaded g-C<sub>3</sub>N<sub>4</sub>@ZIF-8 nanoparticles (Si: substrate, Au: a very thin layer of gold coating for improved conductivity of the sample).

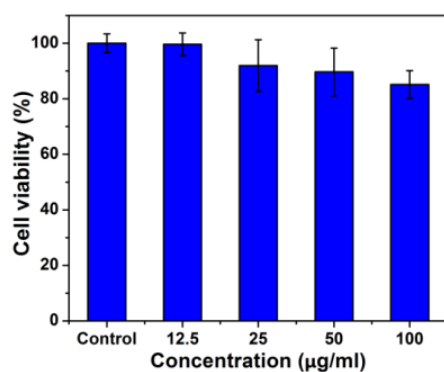

**Fig. S5.** The viability of A549 cells incubated with g-C<sub>3</sub>N<sub>4</sub> nanosheets but without irradiation.

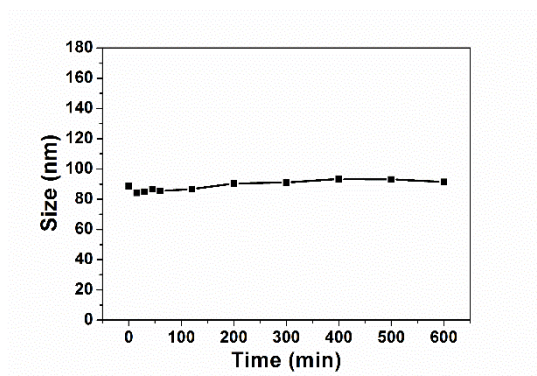

**Fig. S6.** The DLS analysis of the size of g-C<sub>3</sub>N<sub>4</sub>@ZIF-8 nanoparticles at different time points of storage in water.

**Table S1.** Loading efficiency and content of DOX to nanoparticles at different weight ratios

| DOX/ NPs weight ratio | Loading efficiency (%) | Loading content (mg of drug per 1 mg of nanoparticles) |
|-----------------------|------------------------|--------------------------------------------------------|
| 0.1                   | 95.84                  | 0.096                                                  |
| 0.2                   | 53.36                  | 0.167                                                  |
| 0.4                   | 50.27                  | 0.201                                                  |
| 0.6                   | 44.77                  | 0.269                                                  |
| 1.0                   | 34.57                  | 0.336                                                  |
| 1.2                   | 16.14                  | 0.323                                                  |
